# Supplementary material for: 1H/2H and azide/tetrazole isomerizations and their effects on the aromaticity and stability of azido triazoles
Source: Royal Society of Chemistry journal article supplement (doi:10.1039/c4ra14560g), 2014-12-23
Supplement: c4ra14560g1.pdf [file c4ra14560g1.pdf]

Table 1s Total energies ( $E$ , in a.u.) of 1*H*-, 2*H*-, and 4*H*- azide tautomers at different levels

|                   |            | NAzTA      | AAzTA      | AzTA       |
|-------------------|------------|------------|------------|------------|
| B3LYP/6-31G*      | $E(1H-AZ)$ | -610.26050 | -461.11944 | -405.77667 |
|                   | $E(2H-AZ)$ | -610.25985 | -461.11800 | -405.77563 |
|                   | $E(4H-AZ)$ | -610.24425 | -461.09863 | -405.75784 |
| B3LYP/6-311++G**  | $E(1H-AZ)$ | -610.43682 | -461.25794 | -405.89101 |
|                   | $E(2H-AZ)$ | -610.43556 | -461.25580 | -405.88977 |
|                   | $E(4H-AZ)$ | -610.41952 | -461.23563 | -405.87156 |
| B3LYP/AUG-cc-PVDZ | $E(1H-AZ)$ | -610.36000 | -461.19781 | -405.83890 |
|                   | $E(2H-AZ)$ | -610.35976 | -461.19598 | -405.83823 |
|                   | $E(4H-AZ)$ | -610.34484 | -461.17682 | -405.82106 |

Table 2s Total energies ( $E$ , in a.u.) in different solutions predicted at the B3LYP/6-311++G\*\* level

|       |            | Benzene    | Dichloromethane | Acetone    | Methanol   | Water      |
|-------|------------|------------|-----------------|------------|------------|------------|
| NAzTA | $E(1H-AZ)$ | -610.44277 | -610.44756      | -610.44854 | -610.44883 | -610.44911 |
|       | $E(2H-AZ)$ | -610.44592 | -610.45216      | -610.45346 | -610.45384 | -610.45422 |
|       | $E(4H-AZ)$ | -610.43034 | -610.43825      | -610.43995 | -610.44045 | -610.44096 |
| AAzTA | $E(1H-AZ)$ | -461.26447 | -461.26871      | -461.26956 | -461.26981 | -461.27006 |
|       | $E(2H-AZ)$ | -461.26483 | -461.27103      | -461.27233 | -461.27271 | -461.27309 |
|       | $E(4H-AZ)$ | -461.24736 | -461.25605      | -461.25796 | -461.25852 | -461.25908 |
| AzTA  | $E(1H-AZ)$ | -405.89620 | -405.89959      | -405.90027 | -405.90047 | -405.90067 |
|       | $E(2H-AZ)$ | -405.89649 | -405.90106      | -405.90200 | -405.90228 | -405.90255 |
|       | $E(4H-AZ)$ | -405.88180 | -405.88938      | -405.89102 | -405.89150 | -405.89198 |

Table 3s Cartesian coordinates (in Å) of 1*H*-, 2*H*-, and 4*H*- azide tautomers in gas phases obtained at different theoretical levels

(A) B3LYP/6-31G\*

|                                                                                                                                                                                                                                                                            | 1 <i>H</i> -NAzTA-AZ |                      |           | 2 <i>H</i> -NAzTA-AZ |           |           | 4 <i>H</i> -NAzTA-AZ |           |           |                      |                      |                      |
|----------------------------------------------------------------------------------------------------------------------------------------------------------------------------------------------------------------------------------------------------------------------------|----------------------|----------------------|-----------|----------------------|-----------|-----------|----------------------|-----------|-----------|----------------------|----------------------|----------------------|
|                                                                                                                                                                                                                                                                            | X                    | Y                    | Z         | X                    | Y         | Z         | X                    | Y         | Z         |                      |                      |                      |
| N                                                                                                                                                                                                                                                                          | 0.191652             | -0.444792            | 0.000266  | -0.236426            | -0.449112 | -0.000092 | 0.322326             | -0.617830 | -0.002457 |                      |                      |                      |
| C                                                                                                                                                                                                                                                                          | -1.014415            | 0.170436             | -0.000121 | 0.964567             | 0.085568  | -0.000025 | 1.656552             | -0.280741 | 0.003659  |                      |                      |                      |
| N                                                                                                                                                                                                                                                                          | -1.020928            | 1.491215             | -0.001197 | 0.909678             | 1.429432  | 0.000086  | 1.803758             | 1.021393  | 0.025416  |                      |                      |                      |
| N                                                                                                                                                                                                                                                                          | 0.305925             | 1.751437             | -0.001394 | -0.375170            | 1.832854  | -0.000330 | 0.535106             | 1.588244  | 0.008296  |                      |                      |                      |
| C                                                                                                                                                                                                                                                                          | 1.011831             | 0.591969             | -0.000299 | -1.024086            | 0.662685  | 0.000123  | -0.323011            | 0.606329  | -0.008813 |                      |                      |                      |
| N                                                                                                                                                                                                                                                                          | 2.396200             | 0.625182             | -0.000105 | -2.413767            | 0.658299  | 0.000011  | -1.705565            | 0.800826  | -0.002979 |                      |                      |                      |
| N                                                                                                                                                                                                                                                                          | 2.962282             | -0.488916            | 0.000625  | -2.955521            | -0.463494 | 0.000083  | -2.429542            | -0.204028 | 0.001751  |                      |                      |                      |
| N                                                                                                                                                                                                                                                                          | 3.611099             | -1.416813            | 0.001357  | -3.592943            | -1.402103 | 0.000079  | -3.213413            | -1.034777 | 0.006873  |                      |                      |                      |
| N                                                                                                                                                                                                                                                                          | -2.269748            | -0.581093            | 0.000256  | 2.237362             | -0.606434 | 0.000000  | 2.665123             | -1.230827 | -0.086750 |                      |                      |                      |
| O                                                                                                                                                                                                                                                                          | -3.306550            | 0.073852             | 0.003292  | 3.230454             | 0.129915  | 0.000050  | -0.068319            | -1.534409 | -0.170295 |                      |                      |                      |
| O                                                                                                                                                                                                                                                                          | -2.176382            | -1.802994            | -0.002543 | 2.227681             | -1.826410 | -0.000003 | 2.655052             | -1.915228 | 0.665266  |                      |                      |                      |
| H                                                                                                                                                                                                                                                                          | 0.643592             | 2.705157             | -0.002129 | 1.679545             | 2.086340  | 0.000177  | 3.567465             | -0.764897 | -0.115102 |                      |                      |                      |
| -----                                                                                                                                                                                                                                                                      |                      |                      |           |                      |           |           |                      |           |           |                      |                      |                      |
| <table border="0" style="width:100%; border:none;"> <tr> <td style="width:33%; text-align:center">1<i>H</i>-AAzTA-AZ</td> <td style="width:33%; text-align:center">2<i>H</i>-AAzTA-AZ</td> <td style="width:33%; text-align:center">4<i>H</i>-AAzTA-AZ</td> </tr> </table> |                      |                      |           |                      |           |           |                      |           |           | 1 <i>H</i> -AAzTA-AZ | 2 <i>H</i> -AAzTA-AZ | 4 <i>H</i> -AAzTA-AZ |
| 1 <i>H</i> -AAzTA-AZ                                                                                                                                                                                                                                                       | 2 <i>H</i> -AAzTA-AZ | 4 <i>H</i> -AAzTA-AZ |           |                      |           |           |                      |           |           |                      |                      |                      |

|   | X         | Y         | Z         | X         | Y         | Z         | X         | Y         | Z         |
|---|-----------|-----------|-----------|-----------|-----------|-----------|-----------|-----------|-----------|
| N | 0.288552  | -0.699277 | -0.004544 | 0.254229  | -0.675685 | 0.000075  | 0.322326  | -0.617830 | -0.002457 |
| C | 1.610905  | -0.341715 | -0.009979 | 1.547959  | -0.392504 | -0.005996 | 1.656552  | -0.280741 | 0.003659  |
| N | 1.857625  | 0.965500  | 0.001371  | 1.728682  | 0.949538  | 0.004091  | 1.803758  | 1.021393  | 0.025416  |
| N | 0.583785  | 1.480086  | 0.002434  | 0.515460  | 1.598196  | 0.004303  | 0.535106  | 1.588244  | 0.008296  |
| C | -0.313309 | 0.479134  | 0.002827  | -0.312964 | 0.570043  | -0.001264 | -0.323011 | 0.606329  | -0.008813 |
| N | -1.675870 | 0.764036  | 0.010720  | -1.692376 | 0.799096  | 0.004474  | -1.705565 | 0.800826  | -0.002979 |
| N | -2.434414 | -0.223424 | 0.001305  | -2.412922 | -0.211486 | 0.002974  | -2.429542 | -0.204028 | 0.001751  |
| N | -3.242502 | -1.020822 | -0.005099 | -3.199529 | -1.033490 | 0.002524  | -3.213413 | -1.034777 | 0.006873  |
| N | 2.611750  | -1.289300 | -0.080673 | 2.574787  | -1.311239 | -0.080191 | 2.665123  | -1.230827 | -0.086750 |
| H | 2.350699  | -2.181870 | 0.318245  | 2.578252  | 1.486840  | -0.081906 | -0.068319 | -1.534409 | -0.170295 |
| H | 3.512977  | -0.957076 | 0.238866  | 2.242086  | -2.255656 | 0.075697  | 2.655052  | -1.915228 | 0.665266  |
| H | 0.428267  | 2.476838  | 0.007212  | 3.391369  | -1.100929 | 0.482018  | 3.567465  | -0.764897 | -0.115102 |

|   | 1H-AzTA-AZ |           |           | 2H-AzTA-AZ |           |           | 4H-AzTA-AZ |           |           |
|---|------------|-----------|-----------|------------|-----------|-----------|------------|-----------|-----------|
|   | X          | Y         | Z         | X          | Y         | Z         | X          | Y         | Z         |
| N | 0.288552   | -0.699277 | -0.004544 | 0.254229   | -0.675685 | 0.000075  | 0.322326   | -0.617830 | -0.002457 |
| C | 1.610905   | -0.341715 | -0.009979 | 1.547959   | -0.392504 | -0.005996 | 1.656552   | -0.280741 | 0.003659  |
| N | 1.857625   | 0.965500  | 0.001371  | 1.728682   | 0.949538  | 0.004091  | 1.803758   | 1.021393  | 0.025416  |
| N | 0.583785   | 1.480086  | 0.002434  | 0.515460   | 1.598196  | 0.004303  | 0.535106   | 1.588244  | 0.008296  |
| C | -0.313309  | 0.479134  | 0.002827  | -0.312964  | 0.570043  | -0.001264 | -0.323011  | 0.606329  | -0.008813 |
| N | -1.675870  | 0.764036  | 0.010720  | -1.692376  | 0.799096  | 0.004474  | -1.705565  | 0.800826  | -0.002979 |
| N | -2.434414  | -0.223424 | 0.001305  | -2.412922  | -0.211486 | 0.002974  | -2.429542  | -0.204028 | 0.001751  |
| N | -3.242502  | -1.020822 | -0.005099 | -3.199529  | -1.033490 | 0.002524  | -3.213413  | -1.034777 | 0.006873  |
| N | 2.611750   | -1.289300 | -0.080673 | 2.574787   | -1.311239 | -0.080191 | 2.665123   | -1.230827 | -0.086750 |
| H | 2.350699   | -2.181870 | 0.318245  | 2.578252   | 1.486840  | -0.081906 | -0.068319  | -1.534409 | -0.170295 |
| H | 3.512977   | -0.957076 | 0.238866  | 2.242086   | -2.255656 | 0.075697  | 2.655052   | -1.915228 | 0.665266  |
| H | 0.428267   | 2.476838  | 0.007212  | 3.391369   | -1.100929 | 0.482018  | 3.567465   | -0.764897 | -0.115102 |

(B) B3LYP/6-311++G\*\*

|   | 1H-AAzTA-AZ |           |           | 2H-AAzTA-AZ |           |           | 4H-AAzTA-AZ |           |           |
|---|-------------|-----------|-----------|-------------|-----------|-----------|-------------|-----------|-----------|
|   | X           | Y         | Z         | X           | Y         | Z         | X           | Y         | Z         |
| N | 0.193903    | -0.437761 | 0.000836  | 0.234739    | -0.441076 | -0.000107 | -0.159923   | -0.349601 | 0.001039  |
| C | -1.010817   | 0.175399  | -0.000141 | -0.961928   | 0.092979  | -0.000003 | 1.066659    | 0.254258  | -0.000430 |
| N | -1.012432   | 1.490400  | -0.001083 | -0.905069   | 1.434659  | 0.000108  | 0.970106    | 1.551328  | -0.000707 |
| N | 0.312095    | 1.753152  | -0.001407 | 0.380371    | 1.830689  | -0.000318 | -0.361762   | 1.851727  | -0.000195 |
| C | 1.015628    | 0.593195  | -0.000504 | 1.028042    | 0.664319  | 0.000155  | -1.024488   | 0.709417  | 0.000676  |
| N | 2.397481    | 0.617190  | -0.000462 | 2.415095    | 0.650165  | 0.000018  | -2.406988   | 0.659490  | 0.001835  |
| N | 2.957963    | -0.495327 | 0.000613  | 2.951632    | -0.469323 | 0.000039  | -2.949231   | -0.454938 | -0.000289 |
| N | 3.594726    | -1.421214 | 0.001603  | 3.578545    | -1.404850 | 0.000081  | -3.583862   | -1.389184 | -0.001970 |
| N | -2.272760   | -0.579543 | 0.000198  | -2.238335   | -0.606403 | 0.000033  | 2.277559    | -0.536639 | -0.000101 |
| O | -3.305385   | 0.069594  | 0.003654  | -3.231663   | 0.119696  | 0.000053  | 3.345855    | 0.038327  | -0.001148 |
| O | -2.179154   | -1.795201 | -0.003144 | -2.224015   | -1.819253 | -0.000064 | 2.099864    | -1.758209 | 0.001218  |
| H | 0.650611    | 2.705006  | -0.002310 | -1.670105   | 2.095640  | 0.000201  | -0.320075   | -1.348280 | 0.000677  |

|   | X         | Y         | Z         | X         | Y         | Z         | X         | Y         | Z         |
|---|-----------|-----------|-----------|-----------|-----------|-----------|-----------|-----------|-----------|
| N | 0.287640  | -0.691332 | -0.002681 | 0.255471  | -0.670018 | 0.001259  | 0.324163  | -0.617826 | 0.000417  |
| C | 1.610646  | -0.340029 | -0.007571 | 1.547081  | -0.391205 | -0.003945 | 1.657673  | -0.276763 | 0.006321  |
| N | 1.851681  | 0.963228  | 0.000855  | 1.727615  | 0.949205  | 0.002822  | 1.798501  | 1.020875  | 0.024031  |
| N | 0.580535  | 1.482319  | 0.000964  | 0.513123  | 1.593958  | 0.003662  | 0.529377  | 1.584017  | 0.005978  |
| C | -0.315283 | 0.482519  | 0.002553  | -0.315859 | 0.571952  | -0.000184 | -0.324546 | 0.605238  | -0.008866 |
| N | -1.676992 | 0.759009  | 0.011071  | -1.693952 | 0.793487  | 0.004164  | -1.705728 | 0.792760  | 0.000382  |
| N | -2.430823 | -0.226794 | 0.001045  | -2.411909 | -0.213394 | 0.002392  | -2.428469 | -0.206075 | 0.001080  |
| N | -3.227522 | -1.023491 | -0.005740 | -3.190340 | -1.031683 | 0.001521  | -3.208039 | -1.029859 | 0.003747  |
| N | 2.606493  | -1.287251 | -0.074093 | 2.566487  | -1.311144 | -0.074394 | 2.667807  | -1.219223 | -0.083792 |
| H | 2.347336  | -2.193611 | 0.284901  | 2.576298  | 1.486515  | -0.071022 | -0.062223 | -1.535206 | -0.162745 |
| H | 3.518431  | -0.968572 | 0.217823  | 2.254052  | -2.258673 | 0.084548  | 2.645071  | -1.937980 | 0.629670  |
| H | 0.424969  | 2.477430  | 0.007443  | 3.416863  | -1.085200 | 0.421264  | 3.575106  | -0.770352 | -0.114559 |

|   | 1H-AzTA-AZ |           |           | 2H-AzTA-AZ |           |           | 4H-AzTA-AZ |           |           |
|---|------------|-----------|-----------|------------|-----------|-----------|------------|-----------|-----------|
|   | X          | Y         | Z         | X          | Y         | Z         | X          | Y         | Z         |
| N | 0.451065   | 1.025958  | -0.000151 | 0.415312   | 1.001767  | -0.000097 | -0.525390  | 0.942891  | 0.000403  |
| C | 1.815826   | 0.990546  | 0.000244  | 1.733934   | 1.029829  | -0.000036 | -1.899220  | 0.916353  | -0.000028 |
| N | 2.350268   | -0.215759 | -0.000190 | 2.217850   | -0.227382 | 0.000128  | -2.330124  | -0.313543 | -0.000559 |
| N | 1.248767   | -1.015449 | -0.000010 | 1.204059   | -1.130589 | -0.000225 | -1.229585  | -1.148036 | -0.000279 |
| C | 0.135284   | -0.253971 | 0.000095  | 0.146461   | -0.335645 | 0.000083  | -0.169981  | -0.384981 | 0.000291  |
| N | -1.120283  | -0.848528 | 0.000125  | -1.135848  | -0.883693 | 0.000006  | 1.128472   | -0.890486 | 0.000829  |
| N | -2.087883  | -0.070234 | -0.000017 | -2.075537  | -0.078037 | 0.000036  | 2.064263   | -0.085925 | -0.000081 |
| N | -3.051188  | 0.512625  | -0.000064 | -3.027391  | 0.528181  | 0.000081  | 3.014500   | 0.530941  | -0.000751 |
| H | 1.332614   | -2.020268 | -0.000045 | 3.173432   | -0.549167 | 0.000238  | 0.071321   | 1.756318  | 0.001606  |
| H | 2.425502   | 1.880536  | 0.000158  | 2.355079   | 1.912339  | -0.000024 | -2.511065  | 1.804546  | -0.000118 |

(C) B3LYP/AUG-cc-PVDZ

|   | 1H-AAzTA-AZ |           |           | 2H-AAzTA-AZ |           |           | 4H-AAzTA-AZ |           |           |
|---|-------------|-----------|-----------|-------------|-----------|-----------|-------------|-----------|-----------|
|   | X           | Y         | Z         | X           | Y         | Z         | X           | Y         | Z         |
| N | 0.194699    | -0.441223 | 0.000573  | -0.237054   | -0.445302 | -0.000144 | 0.160750    | -0.345962 | -0.000230 |
| C | -1.014536   | 0.171977  | -0.000133 | 0.966020    | 0.090215  | -0.000084 | -1.069828   | 0.252782  | 0.000241  |
| N | -1.017062   | 1.493330  | -0.001044 | 0.909747    | 1.434131  | 0.000137  | -0.975183   | 1.557948  | 0.000295  |
| N | 0.309124    | 1.756255  | -0.001278 | -0.375725   | 1.835147  | -0.000452 | 0.357564    | 1.860796  | -0.000074 |
| C | 1.016598    | 0.596102  | -0.000424 | -1.028502   | 0.664677  | 0.000180  | 1.025102    | 0.712828  | -0.000134 |
| N | 2.402857    | 0.625792  | -0.000340 | -2.419514   | 0.658908  | 0.000031  | 2.411675    | 0.667754  | -0.000467 |
| N | 2.960992    | -0.495061 | 0.000556  | -2.956566   | -0.467821 | 0.000113  | 2.949927    | -0.456159 | 0.000005  |
| N | 3.603433    | -1.426061 | 0.001402  | -3.590395   | -1.407484 | 0.000113  | 3.583857    | -1.399532 | 0.000482  |
| N | -2.273275   | -0.580741 | 0.000195  | 2.239388    | -0.606680 | -0.000101 | -2.274682   | -0.540011 | 0.000033  |
| O | -3.309914   | 0.070330  | 0.003017  | 3.236569    | 0.121022  | 0.000137  | -3.349993   | 0.032681  | 0.000181  |
| O | -2.180645   | -1.800954 | -0.002394 | 2.226676    | -1.824486 | 0.000023  | -2.094064   | -1.765376 | -0.000345 |
| H | 0.646730    | 2.710481  | -0.002091 | 1.679776    | 2.092060  | 0.000266  | 0.323458    | -1.345944 | 0.000355  |

|   | X                 | Y         | Z         | X                 | Y         | Z         | X                 | Y         | Z         |
|---|-------------------|-----------|-----------|-------------------|-----------|-----------|-------------------|-----------|-----------|
| N | 0.286614          | -0.694828 | -0.004077 | 0.254411          | -0.673553 | 0.000674  | 0.322329          | -0.615358 | -0.001747 |
| C | 1.612586          | -0.342839 | -0.007003 | 1.550666          | -0.392270 | -0.004429 | 1.657976          | -0.281251 | 0.004281  |
| N | 1.856123          | 0.965374  | 0.002211  | 1.731067          | 0.950080  | 0.000644  | 1.803993          | 1.022389  | 0.019167  |
| N | 0.583715          | 1.484954  | 0.001560  | 0.517059          | 1.597908  | 0.003793  | 0.535080          | 1.590295  | 0.004549  |
| C | -0.315980         | 0.485215  | 0.001852  | -0.316535         | 0.571966  | -0.000160 | -0.325248         | 0.607840  | -0.004864 |
| N | -1.680494         | 0.767347  | 0.009369  | -1.696498         | 0.800804  | 0.005203  | -1.708855         | 0.801997  | 0.007663  |
| N | -2.433120         | -0.227583 | 0.001327  | -2.415502         | -0.213766 | 0.002644  | -2.430630         | -0.205859 | 0.000661  |
| N | -3.236236         | -1.028351 | -0.004301 | -3.201344         | -1.034897 | 0.001194  | -3.212020         | -1.037830 | -0.002930 |
| N | 2.611565          | -1.291272 | -0.075662 | 2.573145          | -1.314504 | -0.076456 | 2.669174          | -1.228790 | -0.085587 |
| H | 2.352359          | -2.197153 | 0.290265  | 2.583924          | 1.485977  | -0.062154 | -0.072933         | -1.537183 | -0.124833 |
| H | 3.522975          | -0.968681 | 0.220575  | 2.256462          | -2.261545 | 0.093240  | 2.646767          | -1.937552 | 0.641904  |
| H | 0.427863          | 2.482088  | 0.007077  | 3.418467          | -1.087108 | 0.432573  | 3.576293          | -0.772715 | -0.106017 |
|   | <i>1H-AzTA-AZ</i> |           |           | <i>2H-AzTA-AZ</i> |           |           | <i>4H-AzTA-AZ</i> |           |           |
|   | X                 | Y         | Z         | X                 | Y         | Z         | X                 | Y         | Z         |
| N | 0.449818          | 1.029562  | -0.000172 | 0.414078          | 1.005200  | -0.000038 | -0.522413         | 0.941972  | 0.000232  |
| C | 1.817118          | 0.995145  | 0.000255  | 1.737787          | 1.032491  | -0.000040 | -1.897298         | 0.924036  | -0.000140 |
| N | 2.355418          | -0.215485 | -0.000177 | 2.222128          | -0.226860 | 0.000089  | -2.336147         | -0.309953 | -0.000181 |
| N | 1.253258          | -1.016519 | -0.000025 | 1.209370          | -1.133268 | -0.000107 | -1.237916         | -1.150512 | -0.000130 |
| C | 0.135780          | -0.256596 | 0.000101  | 0.146481          | -0.335556 | 0.000013  | -0.170132         | -0.386800 | 0.000122  |
| N | -1.121085         | -0.857327 | 0.000133  | -1.136266         | -0.890850 | -0.000014 | 1.128788          | -0.900784 | 0.000366  |
| N | -2.089628         | -0.069783 | -0.000014 | -2.078449         | -0.077502 | 0.000012  | 2.066207          | -0.087660 | -0.000052 |
| N | -3.060151         | 0.515641  | -0.000063 | -3.038002         | 0.529976  | 0.000061  | 3.020364          | 0.536239  | -0.000362 |
| H | 1.338337          | -2.023291 | -0.000073 | 3.180483          | -0.546875 | 0.000169  | 0.081612          | 1.752379  | 0.001270  |
| H | 2.430865          | 1.889371  | 0.000162  | 2.363893          | 1.918395  | -0.000030 | -2.509214         | 1.819096  | -0.000276 |
